# Supplementary material for: The LsVe1L allele provides a molecular marker for resistance to Verticillium dahliae race 1 in lettuce
Source: PubMed Central journal article supplement (PMC6621938; doi:10.1186/s12870-019-1905-9), 2019-07-10

1

2

3

4

5

6

7

8

V

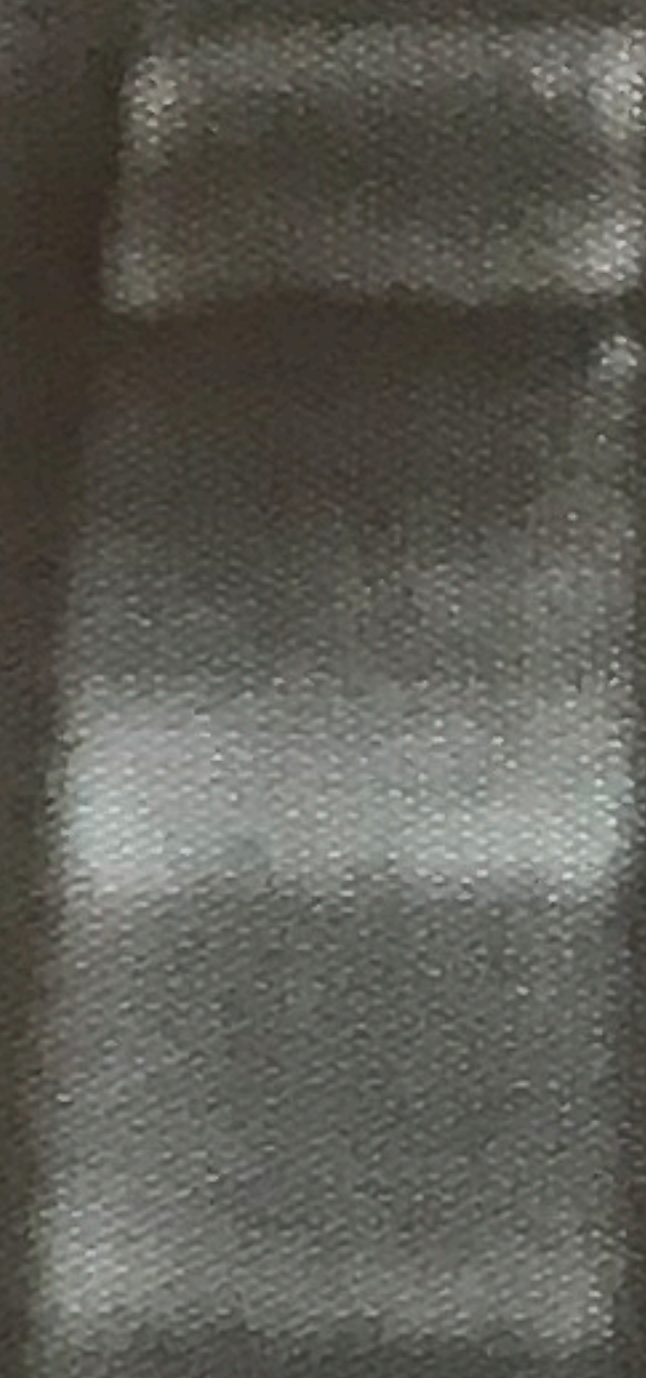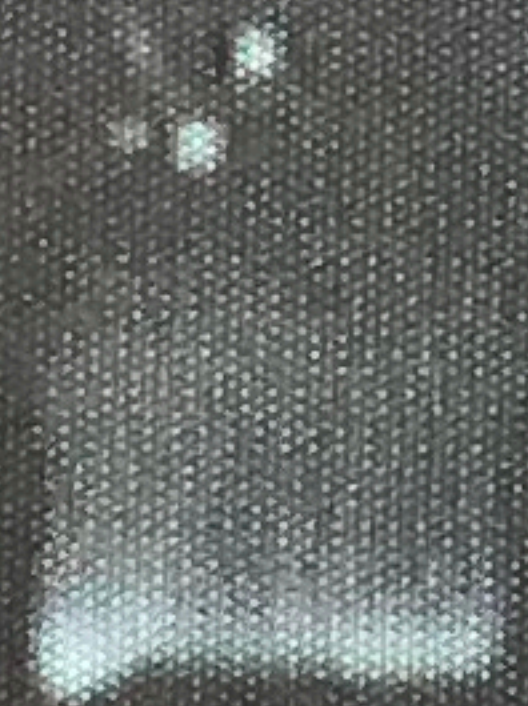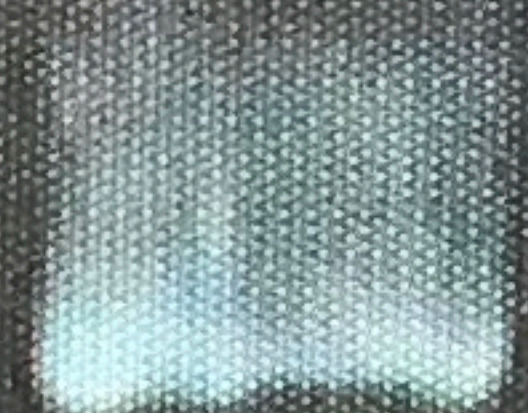

Supplement: 12870_2019_1905_MOESM6_ESM.pdf [file 12870_2019_1905_MOESM6_ESM.pdf]
